# Supplementary material for: The first gladius-bearing coleoid cephalopods from the lower Toarcian “Schistes Cartons” Formation of the Causses Basin (southeastern France)
Source: PeerJ. 2024 Feb 26;12:e16894. doi: 10.7717/peerj.16894 (PMC10903354; doi:10.7717/peerj.16894)
Supplement: Supplemental Information 1 [file peerj-12-16894-s001.xlsx]

## Sheet: Tabelle1
	Preserved gladius length (mm)	Gladius width max (mm)	Median field length/width ratio	Median field width HZ (mm)	Hyperbolar zone length (mm)	Opening angle	Lateral fields width max (mm)	HZL/GL
Paraplesioteuthis sagitatta	203	NA	NA	18	90	11°	35	0.44335
?Loligosepia sp.	76	33	0.434211	NA	7.65	NA	NA	0.100658
	Values in red are approximated
